# Supplementary material
Source: MDPI journal article supplement (https://www.mdpi.com/2079-6412/14/5/619)
Supplement: s1 [file s1]

Article

# Pulsed Electro Decoration of Carbon Nanotubes with $\text{Fe}_x\text{Zn}_{1-x}\text{S}$

Andjelika Bjelajac <sup>1,2,\*</sup>, Ileana Florea <sup>1,3</sup>, Mihai Zamfir <sup>1,4</sup>, Sandrine Tusseau Nenez <sup>5</sup> and Costel Sorin Cojocaru <sup>1</sup>

<sup>1</sup> LPICM, CNRS, Ecole polytechnique, IP Paris, 91228 Palaiseau Cedex, France.

<sup>2</sup> Luxembourg Institute of Science and Technology (LIST), Maison des Matériaux, 28, avenue des Hauts-Fourneaux, L-4365 Esch-sur-Alzette, Luxembourg.

<sup>3</sup> Université Côte d'Azur, CNRS, CRHEA, rue Bernard Grégory, 06560, Valbonne, France

<sup>4</sup> National Institute for Laser, Plasma & Radiation Physics (INFLPR), Atomistilor Street, No. 409, Magurele, Ilfov RO-077125, Romania

<sup>5</sup> LPMC, CNRS, Ecole polytechnique, IP Paris, 91228 Palaiseau Cedex, France

\* Correspondence: author, andjelika.bjelajac@list.lu

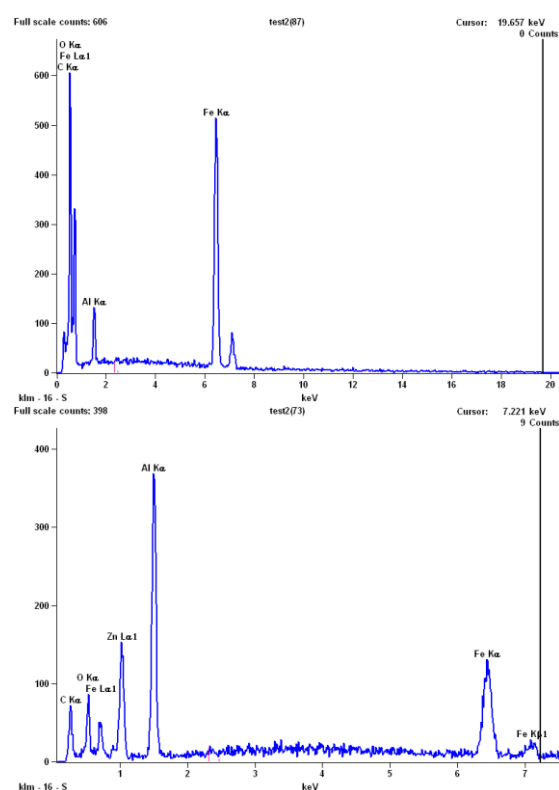

**Figure S1.** EDS spectra of: (a) Fe, and (b) Fe and subsequently deposited Zn particles on CNTs.

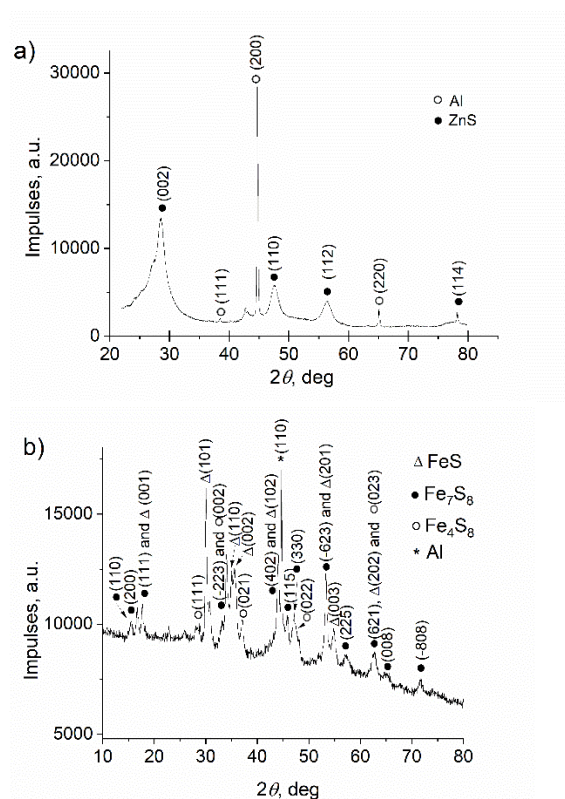

**Figure S2.** XRD diffractograms of: (a) ZnS, and (b) FeS after sulfurization. For the identification of ZnS, the card 01-075-1547 was used; whereas for FeS, the identification was difficult to limit to only one phase (Fe<sub>7</sub>S<sub>8</sub>: 00-052-1516, FeS: 01-089-2331, Fe<sub>4</sub>S<sub>8</sub>: 96-901-3070), but it is certain that there was no iron oxide.
